# Supplementary material
Source: HighWire-hosted journal article supplement (https://www.annfammed.org/highwire/filestream/8192/field_highwire_adjunct_files/1/Farley_Supp_Fig1.pdf)

Online Supplementary Material

Farley TF, Mandava N, Prall FR, Carsky C. Accuracy of primary care clinicians in screening for diabetic retinopathy using single-image retinal photography. *Ann Fam Med.* 2008,6(5):428-434.

<http://www.annfammed.org/cgi/content/full/6/5/428/DC1>

**Supplemental Figure 1. Retinal photograph showing venous beading (vb) and intraretinal microvascular abnormality (IRMA), missed by primary care clinician reader.**

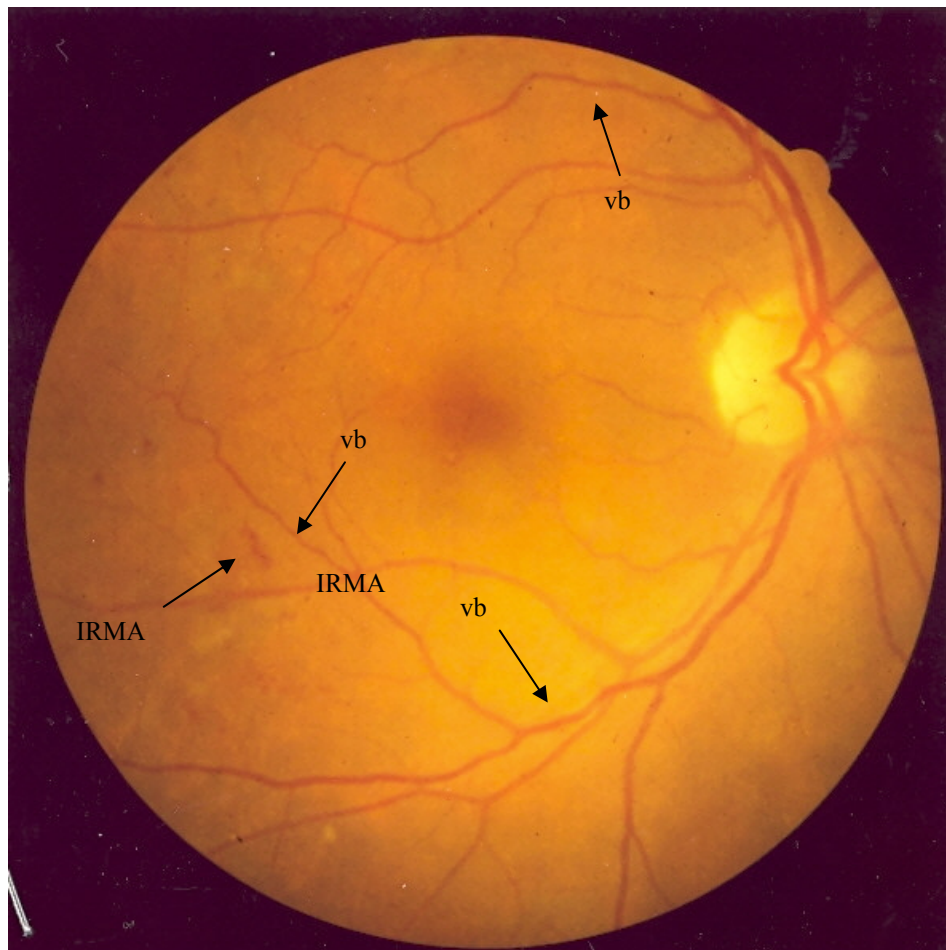

Supplement: Farley_Supp_Fig1.pdf [file Farley_Supp_Fig1.pdf]
